# Supplementary material
Source: MDPI journal article supplement (https://www.mdpi.com/1424-2818/14/2/104)
Supplement: s1 [file s1]

Table S1. Summary of 28 populations used in the present study, including voucher informations.

| Code /<br>location | Latitude/longitude(N/<br>E) | No. | Desert                 | Collecting number | Collector            |
|--------------------|-----------------------------|-----|------------------------|-------------------|----------------------|
| Total              |                             | 280 |                        |                   |                      |
| 1 SHK              | 39.64°/106.60°              | 10  | Kubuqi Desert          | SHK01-10          | Shi XJ &<br>Zhang ML |
| 2 DGN              | 40.71°/108.51°              | 10  |                        | DGN01-10          |                      |
| 3 DGTL             | 40.49°/108.67°              | 10  |                        | DGTL01-10         |                      |
| 4 DLT              | 40.28°/109.93°              | 10  |                        | DLT01-10          |                      |
| 5 AZQ              | 40.33°/109.39°              | 10  | Mu Us Desert           | AZQ01-10          | Shi XJ &<br>Zhang ML |
| 6 BJT              | 38.05°/107.68°              | 10  |                        | BJT01-10          |                      |
| 7 JL               | 37.46°/105.01°              | 10  |                        | JL01-10           |                      |
| 8 YC               | 37.93°/106.41°              | 10  |                        | YC01-10           |                      |
| 9 YBA              | 39.35°/102.34°              | 10  | Badain Jaran<br>Desert | YBA01-10          | Shi XJ &<br>Zhang ML |
| 10 YBB             | 39.55°/102.53°              | 10  |                        | YBB01-10          |                      |
| 11 YQA             | 39.56°/102.60°              | 10  |                        | YQA01-10          |                      |
| 12 YQB             | 39.64°/102.58°              | 10  |                        | YQB01-10          |                      |
| 13 WHA             | 39.78°/106.86°              | 10  | Ulan Buh<br>Desert     | WHA01-10          | Shi XJ &<br>Zhang ML |
| 14 WHB             | 39.78°/106.85°              | 10  |                        | WHB01-10          |                      |
| 15 WHC             | 39.64°/106.63°              | 10  |                        | WHC01-10          |                      |
| 16 WHD             | 39.64°/106.6°               | 10  |                        | WHD01-10          |                      |
| 17 WHE             | 39.91°/106.66°              | 10  |                        | WHE01-10          |                      |
| 18 WHF             | 39.82°/106.69°              | 10  |                        | WHF01-10          |                      |
| 19 WHG             | 40.03°/106.63°              | 10  |                        | WHG01-10          |                      |
| 20 WST             | 38.16°/107.51°              | 10  |                        | WST01-10          |                      |
| 21 ZQA             | 38.71°/105.33°              | 10  | Tengger Desert         | ZQA01-10          | Shi XJ &<br>Zhang ML |
| 22 ZQB             | 38.69°/105.40°              | 10  |                        | ZQB01-10          |                      |
| 23 ZWA             | 37.57°/105.10°              | 10  |                        | ZWA01-10          |                      |
| 24 ZWB             | 37.59°/104.6°               | 10  |                        | ZWB01-10          |                      |
| 25 ZQC             | 38.55°/105.35°              | 10  |                        | ZQC01-10          |                      |
| 26 SPT             | 37.45°/104.93°              | 10  |                        | SPT01-10          |                      |
| 27 MJW             | 37.89°/107.58°              | 10  |                        | MJW01-10          |                      |
| 28 ZQDS            | 38.30°/103.72°              | 10  |                        | ZQDS01-10         |                      |

Table S2. The haplotype sequences of the two chloroplast DNA fragment from 28 populations of *S. centiflora* used in analysis from five deserts in Northwest China with corresponding GenBank reference numbers for each haplotype.

| Haplotype | <i>psbA-trnH</i> | <i>rps16-trnQ</i> |
|-----------|------------------|-------------------|
| H1        | MF416962         | MF416968          |
| H2        | MF416963         | MF416969          |
| H3        | MF416964         | MF416970          |
| H4        | MF416967         | MF416972          |
| H5        | MF416965         | MF416968          |
| H6        | MF416966         | MF416971          |

Table S3. The ribotype sequences based on the ITS fragment from 250 individuals of *S. centiflora* used in analysis from five deserts in Northwest China with corresponding GenBank reference numbers for each ribotype.

| Rapotype | ITS      |
|----------|----------|
| R1       | MF416973 |
| R2       | MF416974 |
| R3       | MF416975 |
| R4       | MF416976 |
| R5       | MF416977 |
| R6       | MF416978 |
| R7       | MF416979 |
| R8       | MF416980 |
| R9       | MF416981 |
| R10      | MF416982 |
| R11      | MF416983 |
| R12      | MF416984 |
| R13      | MF416985 |
| R14      | MF416986 |
| R15      | MF416987 |
| R16      | MF416988 |
| R17      | MF416989 |
| R18      | MF416990 |
| R19      | MF416991 |
| R20      | MF416992 |
| R21      | MF416993 |
| R22      | MF416994 |
| R23      | MF416995 |
| R24      | MF416996 |
| R25      | MF416997 |
| R26      | MF416998 |
| R27      | MF416999 |
| R28      | MF417000 |
| R29      | MF417001 |
| R30      | MF417002 |
| R31      | MF417003 |

Table S4. Summary of the six haplotypes (H1-H6) based on aligned sequences of the two chloroplast DNA fragment of 280 individuals and 28 populations of *S. centiflora* from five deserts in Northwest China.

| Hap          | <i>psbA-trnH</i> |     |     |     |     | <i>rps16-trnQ</i> |     |     |     |
|--------------|------------------|-----|-----|-----|-----|-------------------|-----|-----|-----|
| Nucleotide   | 185              | 270 | 308 | 347 | 376 | 147               | 359 | 667 | 769 |
| Position(bp) |                  |     |     |     |     |                   |     |     |     |
| H1           | C                | A   | T   | T   | C   | G                 | C   | C   | T   |
| H2           | C                | A   | G   | T   | C   | A                 | C   | C   | C   |
| H3           | C                | A   | G   | A   | C   | G                 | A   | C   | C   |
| H4           | C                | G   | G   | A   | C   | G                 | C   | C   | C   |
| H5           | T                | A   | T   | T   | C   | G                 | C   | C   | T   |
| H6           | T                | A   | T   | T   | T   | G                 | C   | T   | T   |

| Ribotypes    | ITS |     |     |     |     |     |     |     |     |     |   |     |
|--------------|-----|-----|-----|-----|-----|-----|-----|-----|-----|-----|---|-----|
| Nucleotide   |     |     |     |     |     |     |     |     |     |     |   |     |
| Position(bp) |     |     |     |     |     |     |     |     |     |     |   | 4   |
|              | 284 | 295 | 299 | 430 | 461 | 475 | 480 | 483 | 489 | 490 | 9 | 494 |
|              |     |     |     |     |     |     |     |     |     |     |   | 1   |

|     |   |   |   |   |   |   |   |   |   |   |   |   |
|-----|---|---|---|---|---|---|---|---|---|---|---|---|
| R1  | C | T | C | C | C | C | C | C | A | G | G | C |
| R2  | C | C | C | C | C | C | C | C | G | G | G | C |
| R3  | C | T | C | C | C | C | C | C | A | G | G | C |
| R4  | C | C | C | C | C | C | C | C | G | G | G | C |
| R5  | C | C | C | C | C | C | C | C | G | G | G | C |
| R6  | C | C | C | C | C | C | C | C | G | G | G | C |
| R7  | C | C | C | C | C | C | C | C | G | G | G | C |
| R8  | C | C | C | C | C | C | C | C | G | G | G | C |
| R9  | C | T | C | C | C | C | C | C | G | G | G | C |
| R10 | C | C | C | C | C | C | C | C | G | G | G | C |
| R11 | C | T | C | C | C | C | C | C | A | G | G | C |
| R12 | C | C | T | T | C | C | C | C | G | G | G | C |
| R13 | C | C | C | C | C | C | C | C | G | G | A | C |
| R14 | T | C | C | C | C | C | C | T | A | A | G | C |
| R15 | C | C | C | C | C | C | C | C | G | G | G | C |
| R16 | C | C | C | C | C | C | C | C | G | G | G | C |
| R17 | C | C | C | C | C | C | C | C | G | G | G | C |
| R18 | C | C | C | C | C | T | C | C | G | G | G | C |
| R19 | C | C | C | C | C | C | C | C | G | G | G | C |
| R20 | C | C | C | C | C | C | C | C | G | G | G | C |
| R21 | C | C | C | C | C | C | C | C | G | G | G | C |
| R22 | C | C | C | C | C | C | C | C | G | G | G | G |
| R23 | C | C | C | C | C | C | C | C | G | G | G | C |
| R24 | C | C | C | C | C | C | A | C | G | G | G | C |
| R25 | C | C | C | C | C | C | C | C | G | G | G | C |
| R26 | C | C | C | C | C | C | C | C | G | G | G | C |
| R27 | C | C | C | C | C | C | C | C | G | G | G | C |
| R28 | C | C | C | C | C | C | C | C | G | G | G | C |
| R29 | C | C | C | C | T | C | C | C | G | G | G | C |
| R30 | C | C | C | C | C | C | C | C | G | G | A | C |
| R31 | C | C | C | C | C | C | C | C | G | G | G | C |

| Ribotypes    | ITS |     |     |     |     |     |     |     |
|--------------|-----|-----|-----|-----|-----|-----|-----|-----|
| Nucleotide   |     |     |     |     |     |     |     |     |
| Position(bp) | 552 | 573 | 611 | 622 | 630 | 635 | 637 | 680 |
| R1           | G   | C   | T   | G   | G   | C   | C   | C   |
| R2           | G   | C   | T   | G   | G   | C   | C   | C   |
| R3           | G   | C   | T   | G   | G   | C   | C   | T   |
| R4           | G   | C   | T   | G   | G   | C   | C   | T   |
| R5           | G   | C   | T   | A   | G   | C   | T   | C   |
| R6           | G   | C   | T   | A   | G   | C   | C   | C   |

---

|     |   |   |   |   |   |   |   |   |
|-----|---|---|---|---|---|---|---|---|
| R7  | G | C | T | A | G | C | C | C |
| R8  | G | C | T | G | G | C | C | C |
| R9  | G | C | T | G | G | C | C | C |
| R10 | G | T | T | G | G | C | C | C |
| R11 | G | C | T | G | G | C | C | C |
| R12 | G | T | T | G | G | C | C | C |
| R13 | G | T | T | G | G | C | C | C |
| R14 | G | C | T | G | A | C | C | C |
| R15 | G | C | T | A | G | C | C | C |
| R16 | G | C | T | A | G | C | C | C |
| R17 | G | C | T | A | G | C | C | C |
| R18 | G | C | T | A | G | C | C | C |
| R19 | G | C | T | A | G | C | C | C |
| R20 | G | C | T | A | G | C | C | C |
| R21 | G | C | T | A | G | C | C | C |
| R22 | G | C | T | A | G | C | C | C |
| R23 | G | C | T | A | G | C | C | C |
| R24 | G | C | C | A | G | C | C | C |
| R25 | G | C | T | A | G | C | C | C |
| R26 | G | C | T | A | G | C | C | C |
| R27 | G | C | T | A | G | T | C | C |
| R28 | G | C | T | A | G | C | T | C |
| R29 | G | C | T | A | G | C | T | C |
| R30 | G | C | T | A | G | C | T | C |
| R31 | T | C | T | A | G | C | T | C |

---
